# Supplementary material for: Unlocking advanced CO 2 separation via a scalable and nitrogen-rich MOF-cross-linked polydimethylsiloxane hollow fiber hybrid membrane
Source: Royal Society of Chemistry journal article supplement (doi:10.1039/d4ta05319b), 2024-11-22
Supplement: d4ta05319b1.pdf [file d4ta05319b1.pdf]

## **Supplementary Information**

### **Unlocking Advanced CO<sub>2</sub> Separation via Scalable and Nitrogen-rich MOF-Cross-linked Polydimethylsiloxane Hollow Fiber Hybrid Membrane**

Nayan Nandha<sup>a,b</sup>, Parth Pratim Mondal<sup>b,c</sup>, Utpal Thummar<sup>d</sup>, Ranadip Goswami<sup>e</sup>, Pranay Kumar<sup>a,b</sup>, Subhadip Neogi<sup>\*b,c</sup>, Puyam Singh<sup>\*a,b</sup>

<sup>a</sup>Membrane Science and Separation Technology, CSIR- Central Salt & Marine Chemicals Research Institute, Bhavnagar, 364002, Gujarat, India.

<sup>b</sup>Academy of Scientific and Innovative Research (AcSIR), Ghaziabad 201 002, India.

<sup>c</sup>Inorganic Materials & Catalysis Division, CSIR-Central Salt & Marine Chemicals Research Institute, Bhavnagar, 364002, Gujarat, India.

<sup>d</sup>University of Rennes, CNRS, ISCR (Institut des Sciences Chimiques de Rennes) – UMR 6226, F-35000, Rennes, France.

<sup>e</sup>Laboratory of Advanced Separations, École Polytechnique Fédérale de Lausanne (EPFL), 1950 Sion, Switzerland.

\*Corresponding Author.

E-mail address: [puyam@csmcri.res.in](mailto:puyam@csmcri.res.in), [sneogi@csmcri.res.in](mailto:sneogi@csmcri.res.in)

**Table of contents:**

| <b>Content</b>                                                                                                                                    | <b>Page no.</b> |
|---------------------------------------------------------------------------------------------------------------------------------------------------|-----------------|
| <b>Scheme S1:</b> Synthesis of MOF                                                                                                                | 3               |
| <b>Figure S1:</b> (a) Basic structural unit of MOF (with highly disordered pyridyl arm) (b) S-shaped channels along the 'a' crystallographic axis | 3               |
| <b>Figure S2</b> Hollow fiber spinning unit                                                                                                       | 4               |
| <b>Figure S3</b> Hollow fiber membrane spray coating method                                                                                       | 4               |
| Procedure to separate MOF-PDMS coating film from the support                                                                                      | 5               |
| <b>Figure S4</b> Cross-section SEM images of PDMS concentration variation                                                                         | 6               |
| <b>Figure S5</b> Top surface SEM images of Neat PDMS and MOF-PDMS membranes                                                                       | 7               |
| <b>Figure S6</b> XPS spectra of MOF particles                                                                                                     | 8               |
| <b>Figure S7:</b> TGA curve of the as-synthesized and activated material                                                                          | 8               |
| <b>Figure S8</b> XPS survey graphs of Membranes                                                                                                   | 9               |
| <b>Figure S9</b> General cross-linking reaction of PDMS with PMHS                                                                                 | 10              |
| <b>Figure S10</b> Various chemical structures of cross-linked PDMS                                                                                | 10              |
| <b>Figure S11</b> Gas adsorption isotherm of MOF for CO <sub>2</sub> , N <sub>2</sub> and CH <sub>4</sub> at 298K                                 | 11              |
| <b>Figure S12</b> Gas Permeance and Selectivity graph of 1-MOF-PDMS sample                                                                        | 11              |
| <b>Table S1</b> Crystal data and structure refinement for MOF                                                                                     | 12              |
| <b>Reference</b>                                                                                                                                  | 12              |

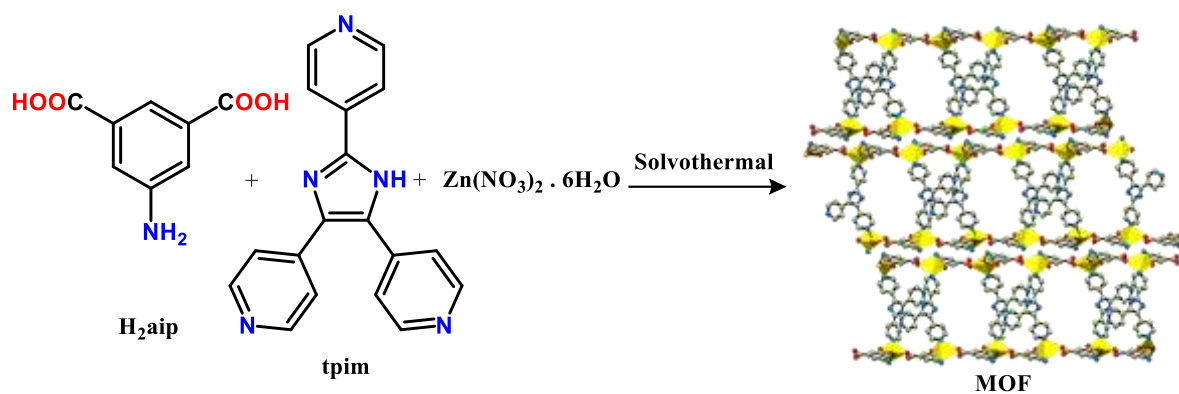

**Scheme S1:** Synthesis of MOF.

a)

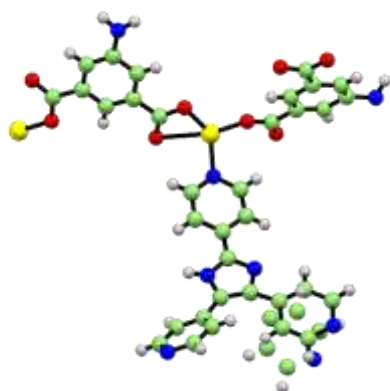

b)

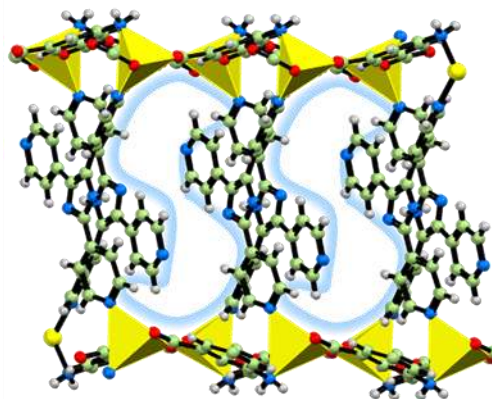

**Figure S1:** (a) Basic structural unit of MOF (with highly disordered pyridyl arm) (b) S-shaped channels along the 'a' crystallographic axis

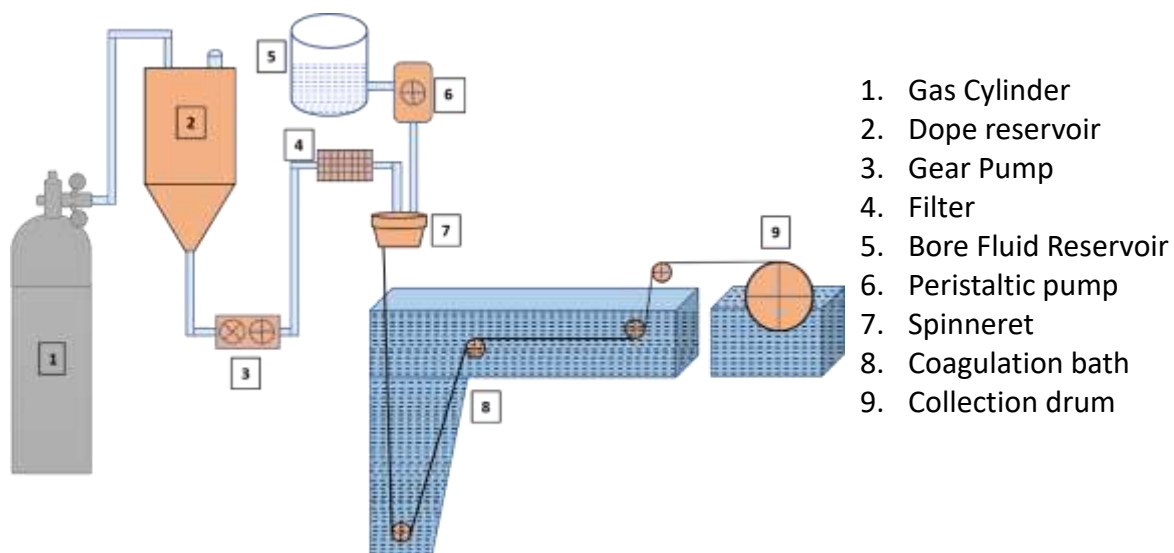

**Figure S2:** Hollow fiber spinning unit.

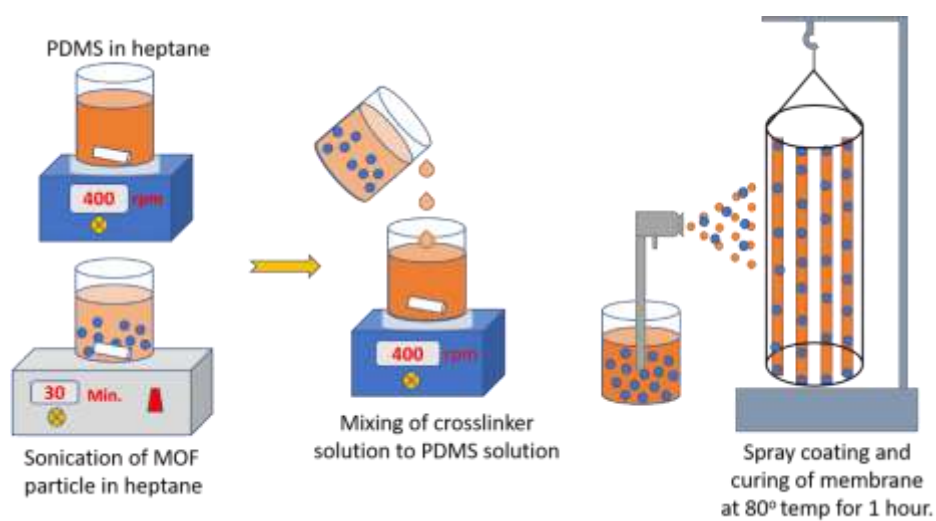

**Figure S3:** Hollow fiber membrane spray coating process.

### **S1. Procedure to separate MOF-PDMS coating film from the support:**

In the hybrid membrane, MOF-PDMS formed the top coating layer and the PSf is a polymeric porous hollow fiber support. To characterize the film better, a freestanding MOF-PDMS film is necessary to separate from the support. First, the hollow fibers were cut and made like a flat film by applying gentle pressure. Now these films were dipped into the DMF so they started to float upon the surface of the DMF and support polymer PSf gradually started to dissolve. This resulted in transparent to translucent floating freestanding films of MOF-PDMS. The freestanding film was deposited upon a silicon wafer support and dried overnight at room temperature. These films were again dipped in DMF two times to completely remove the traces of support polymer. Finally, the film upon the silicon wafer support dried at 60 °C in a hot air oven. This method for the removal of freestanding methods is reported previously.<sup>1</sup>

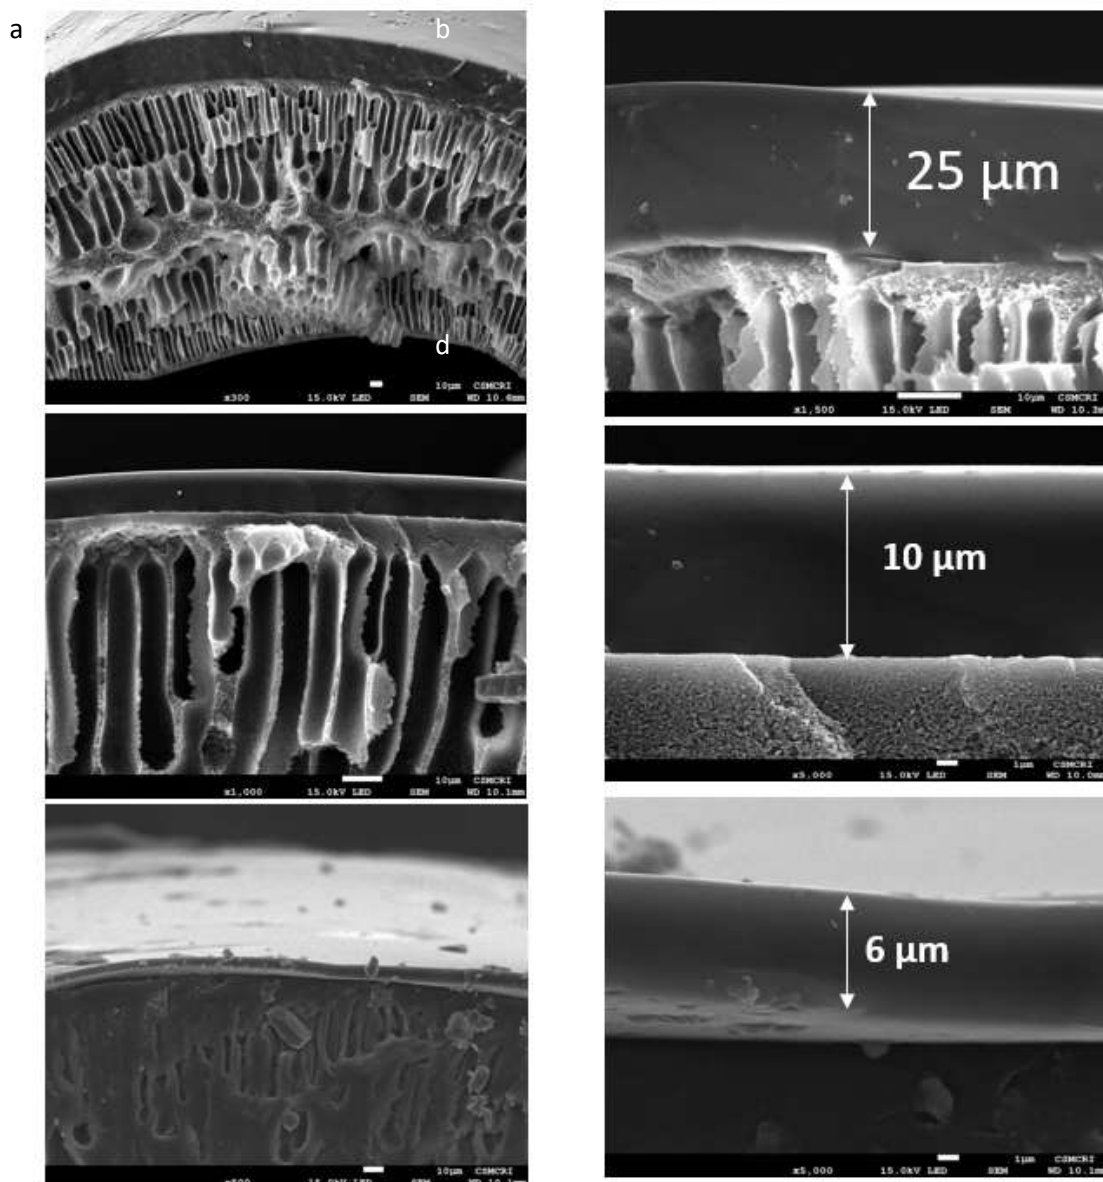

**Figure S4:** SEM cross-section images of 25% (a,b), 10% (c,d), and 5% (e,f) PDMS solution coating and their effective coating layer thickness respectively.

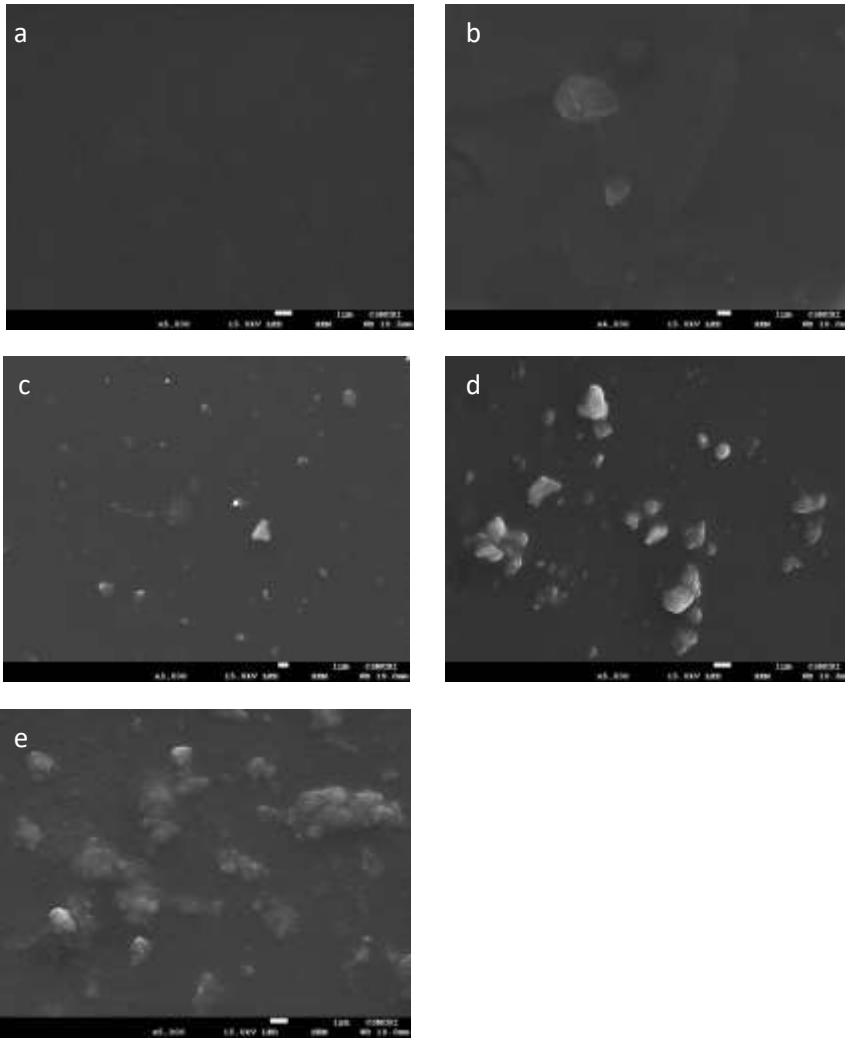

**Figure S5:** Top surface SEM images of membrane samples, (a) PDMS, (b) 0.5-MOF-PDMS, (c) 1-MOF-PDMS, (d) 2-MOF-PDMS, (e) 4-MOF-PDMS.

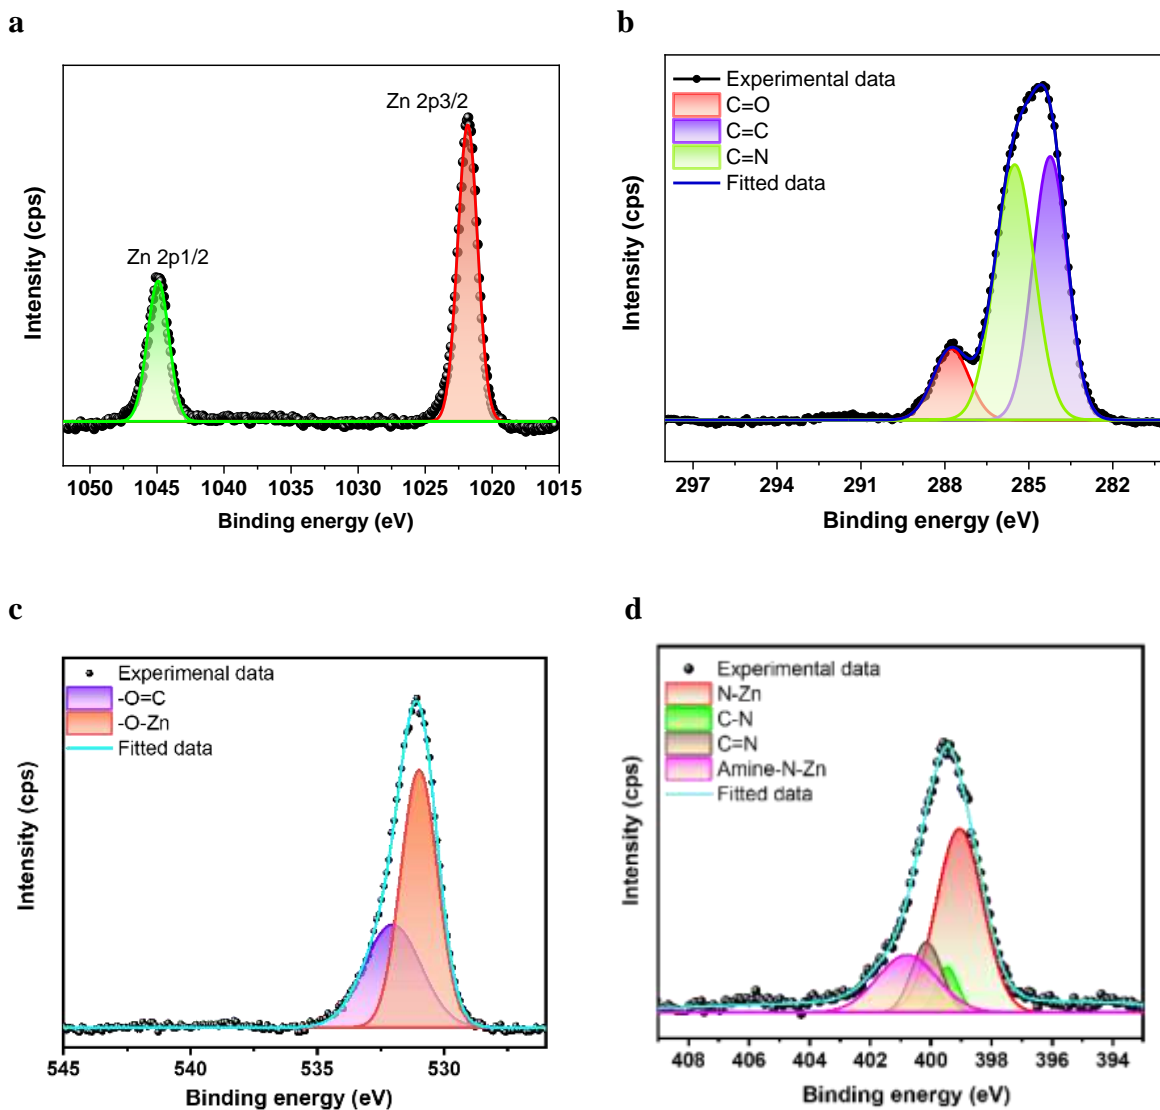

**Figure S6:** XPS spectra of (a) Zn 2p (b) C1s, (c) O1s, (d) N1s for MOF particle.

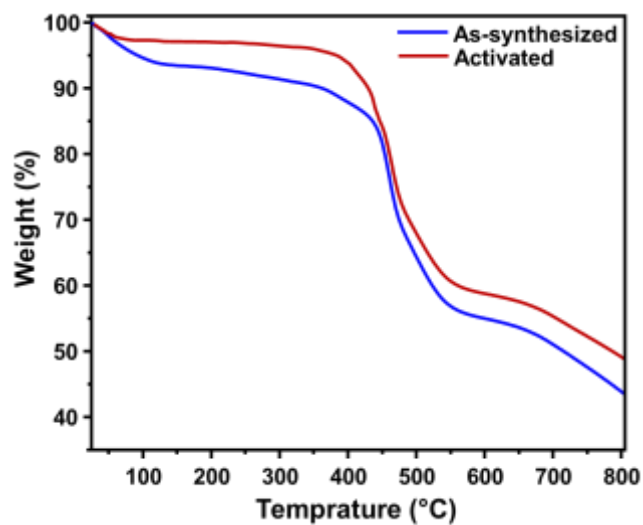

**Figure S7:** TGA curve of the as-synthesized and activated MOF material.



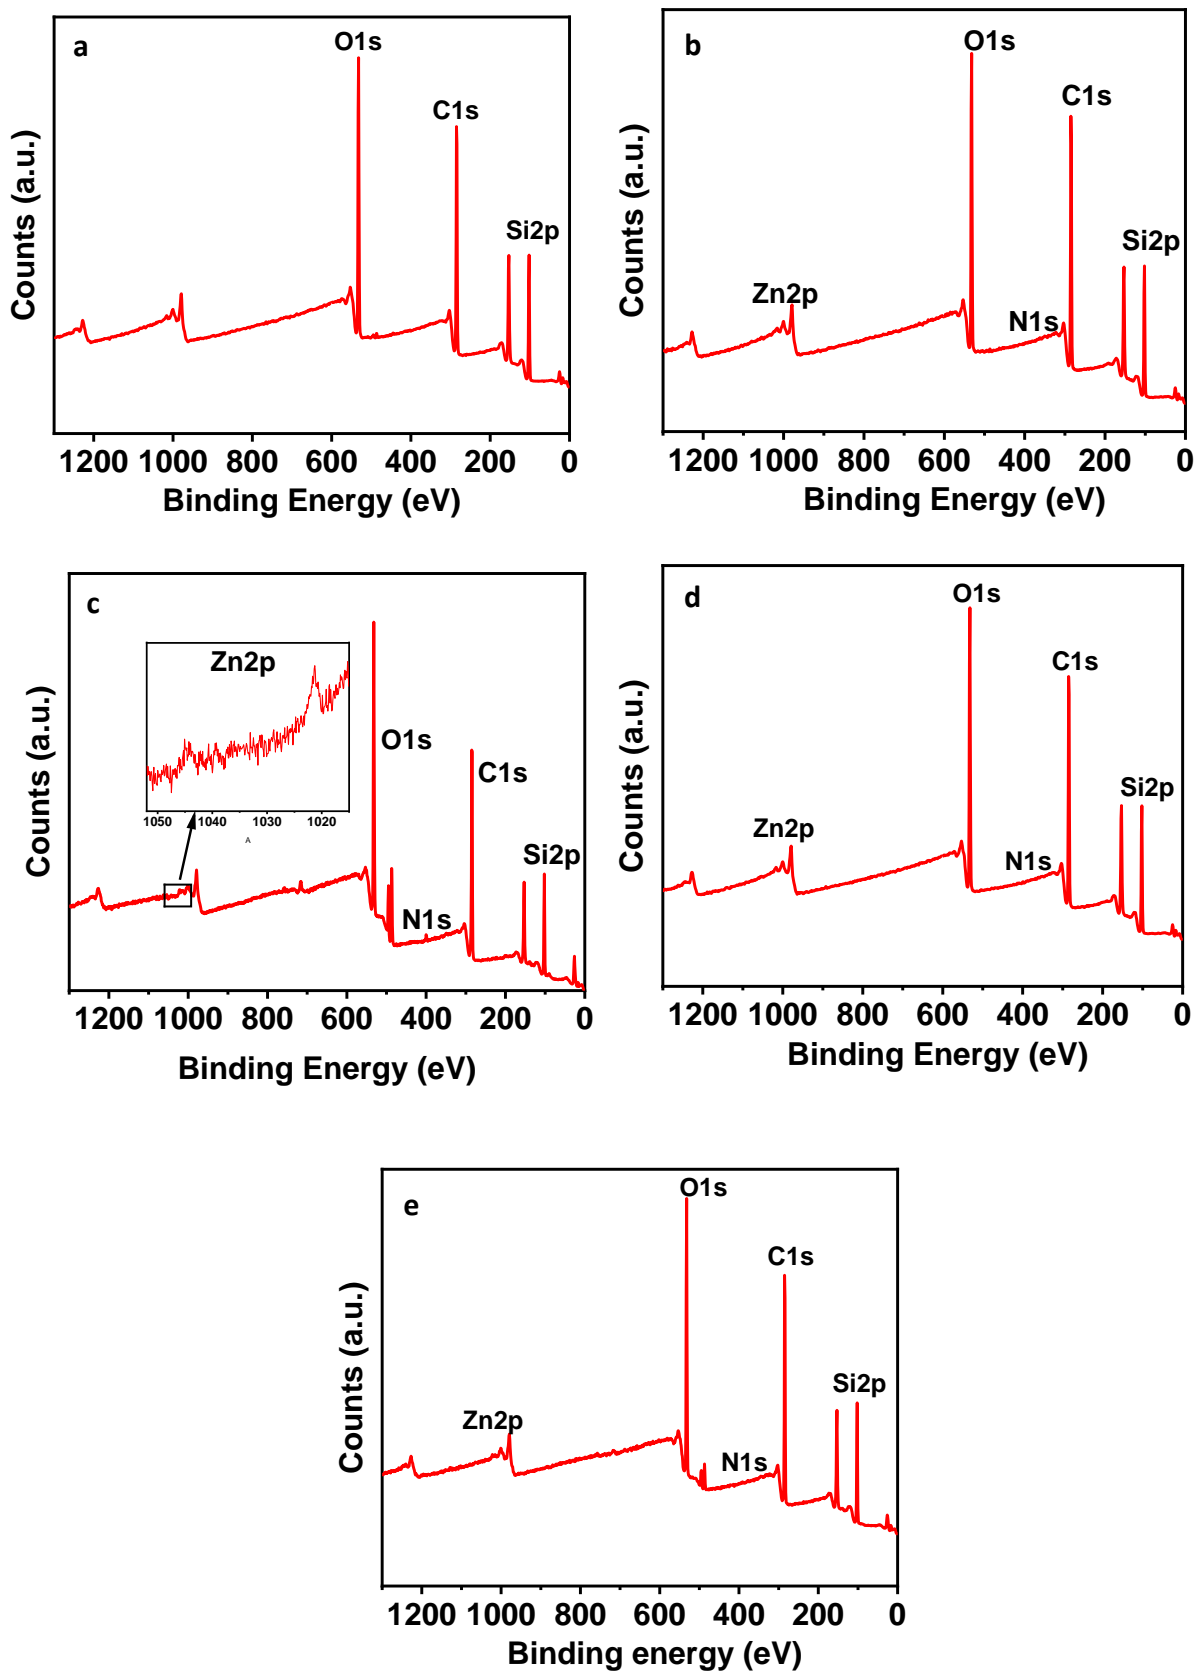

**Figure S8:** XPS survey spectra of (a) Neat PDMS (b) 0.5-MOF-PDMS, (c) 1-MOF-PDMS, (d) 2-MOF-PDMS, and (e) 4-MOF-PDMS membrane sample.

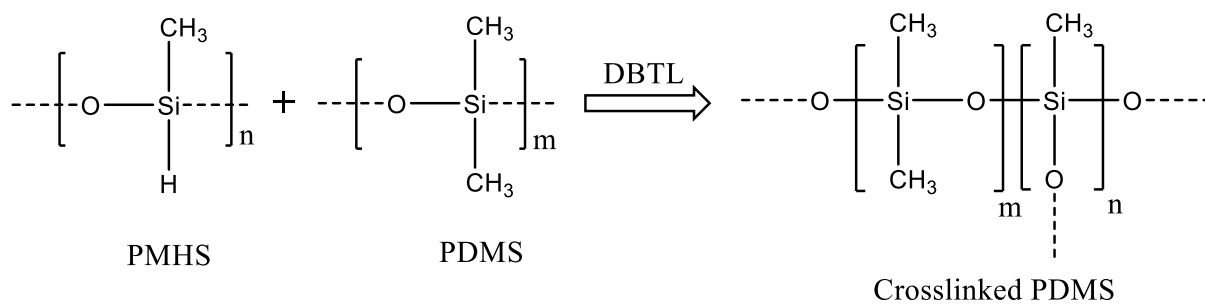

**Figure S9:** Crosslinking reaction of Pre-polymer PDMS with cross-linker PMHS in the presence of DBTL catalyst.

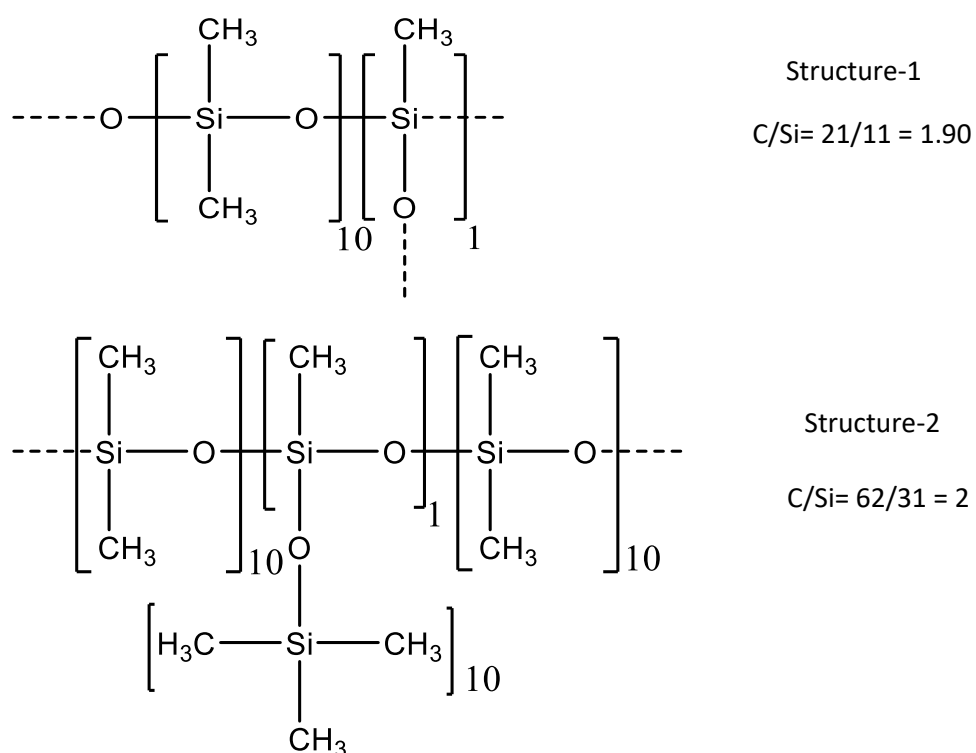

**Figure S10:** Chemical structure of crosslinked PDMS. Structure-1 corresponds to 1-MOF-PDMS membrane structure with C/Si ratio = 1.9. Structure-2 corresponds to 0.5-MOF-PDMS and 2-MOF-PDMS membrane structures with a C/Si ratio = 2.

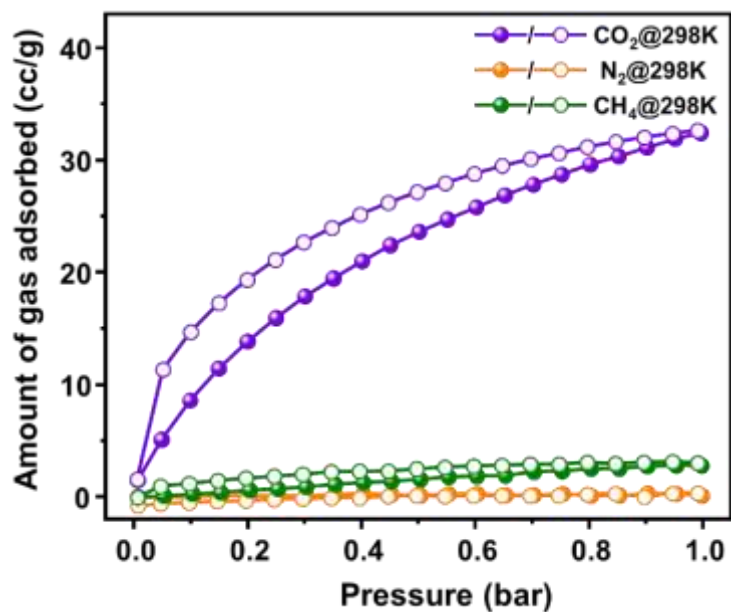

**Figure S11:** Gas adsorption isotherm of MOF for CO<sub>2</sub>, N<sub>2</sub> and CH<sub>4</sub> at 298K.

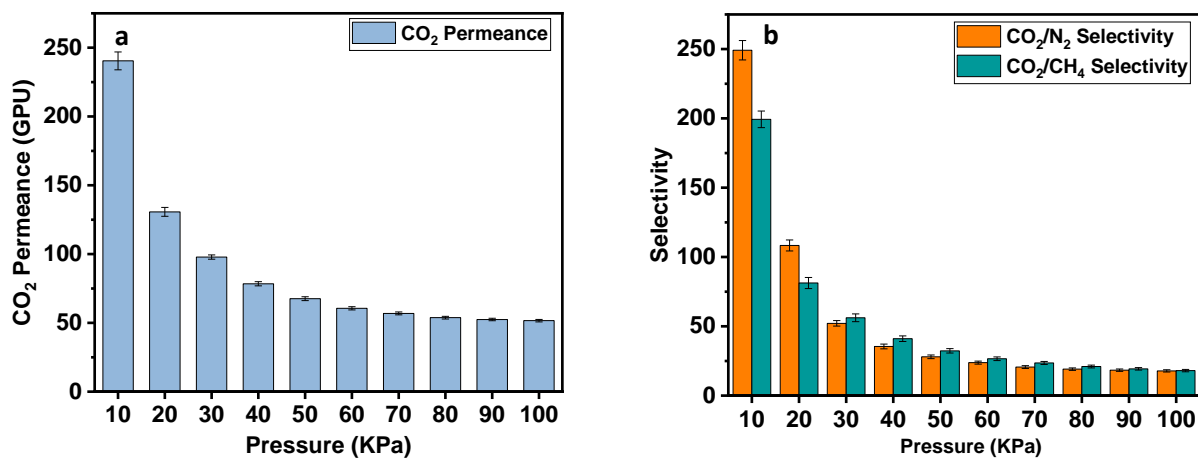

**Figure S12:** (a) CO<sub>2</sub> permeance of 1-MOF-PDMS membrane, (b) CO<sub>2</sub>/N<sub>2</sub> and CO<sub>2</sub>/CH<sub>4</sub> selectivity of 1-MOF-PDMS membrane.

**Table S1 Crystal data and structure refinement for MOF.**

|                                             |                                                                               |
|---------------------------------------------|-------------------------------------------------------------------------------|
| -Identification code                        | MOF                                                                           |
| Empirical formula                           | C <sub>31</sub> H <sub>14</sub> N <sub>6</sub> O <sub>8</sub> Zn <sub>2</sub> |
| Formula weight                              | 729.22                                                                        |
| Temperature/K                               | 162.0                                                                         |
| Crystal system                              | monoclinic                                                                    |
| Space group                                 | P2 <sub>1</sub> /n                                                            |
| a/Å                                         | 16.017(2)                                                                     |
| b/Å                                         | 7.6428(9)                                                                     |
| c/Å                                         | 35.361(5)                                                                     |
| α/°                                         | 90                                                                            |
| β/°                                         | 99.594(4)                                                                     |
| γ/°                                         | 90                                                                            |
| Volume/Å <sup>3</sup>                       | 4268.2(9)                                                                     |
| Z                                           | 4                                                                             |
| ρ <sub>calc</sub> /cm <sup>3</sup>          | 1.135                                                                         |
| μ/mm <sup>-1</sup>                          | 1.168                                                                         |
| F(000)                                      | 1464.0                                                                        |
| Crystal size/mm <sup>3</sup>                | 0.02 × 0.02 × 0.01                                                            |
| Radiation                                   | MoKα (λ = 0.71073)                                                            |
| 2θ range for data collection/°              | 6.008 to 43.93                                                                |
| Index ranges                                | -16 ≤ h ≤ 16, -8 ≤ k ≤ 8, -37 ≤ l ≤ 37                                        |
| Reflections collected                       | 51219                                                                         |
| Independent reflections                     | 4190 [R <sub>int</sub> = 0.0897, R <sub>sigma</sub> = 0.0375]                 |
| Data/restraints/parameters                  | 4190/15/493                                                                   |
| Goodness-of-fit on F <sup>2</sup>           | 1.027                                                                         |
| Final R indexes [I ≥ 2σ (I)]                | R <sub>1</sub> = 0.0400, wR <sub>2</sub> = 0.0875                             |
| Final R indexes [all data]                  | R <sub>1</sub> = 0.0846, wR <sub>2</sub> = 0.1189                             |
| Largest diff. peak/hole / e Å <sup>-3</sup> | 0.71/-0.26                                                                    |

**Reference:**

- 1 U. G. Thummar, A. Koradiya, M. Saxena and V. Poliseti, *Desalination*, 2022, **530**, 115650.
